# Supplementary material for: Expression Changes in the Stroma of Prostate Cancer Predict Subsequent Relapse
Source: PubMed Central journal article supplement (PMC3411675; doi:10.1371/journal.pone.0041371), 2012-08-01

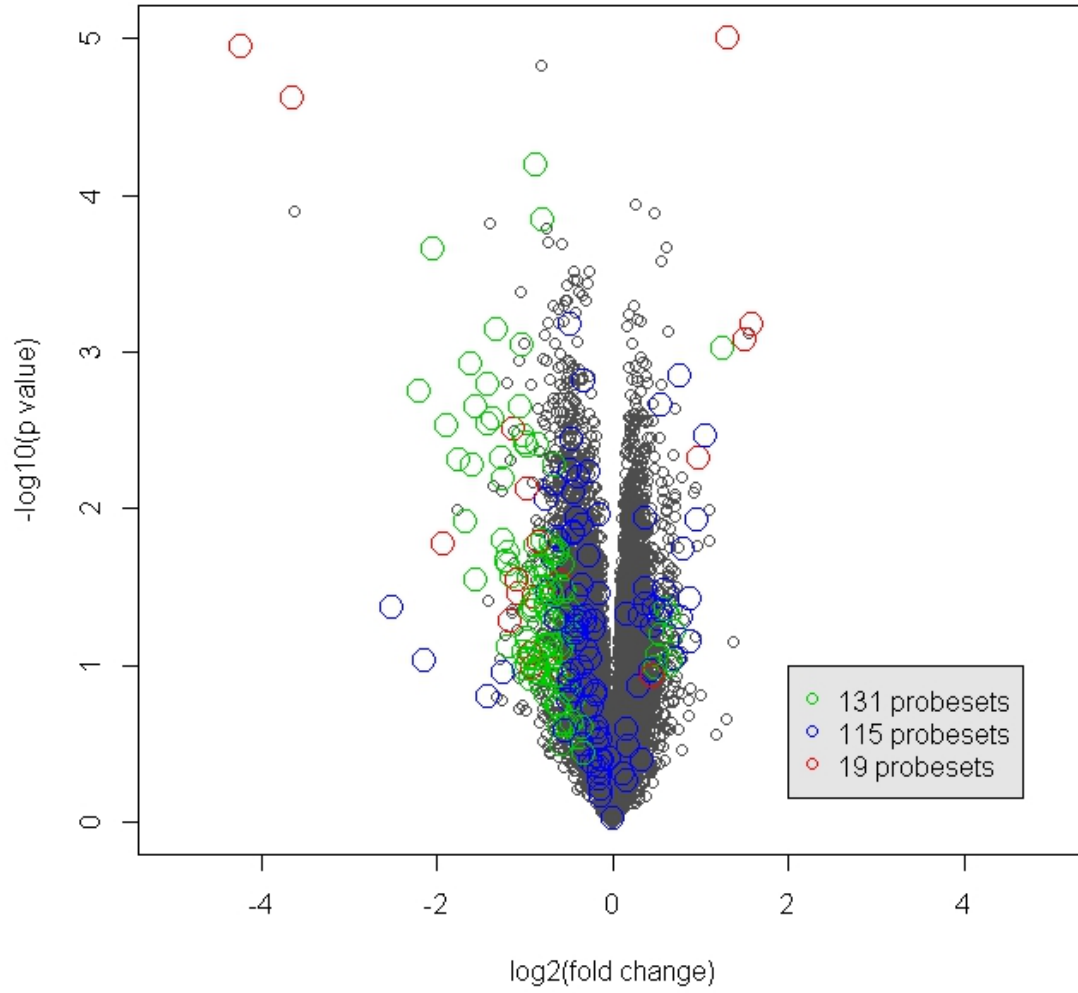

Supplement: pone.0041371.s003.pdf [file pone.0041371.s003.pdf]
