# Supplementary material for: Expression Changes in the Stroma of Prostate Cancer Predict Subsequent Relapse
Source: PubMed Central journal article supplement (PMC3411675; doi:10.1371/journal.pone.0041371), 2012-08-01
Supplement: pone.0041371.s004.pdf [file pone.0041371.s004.pdf]

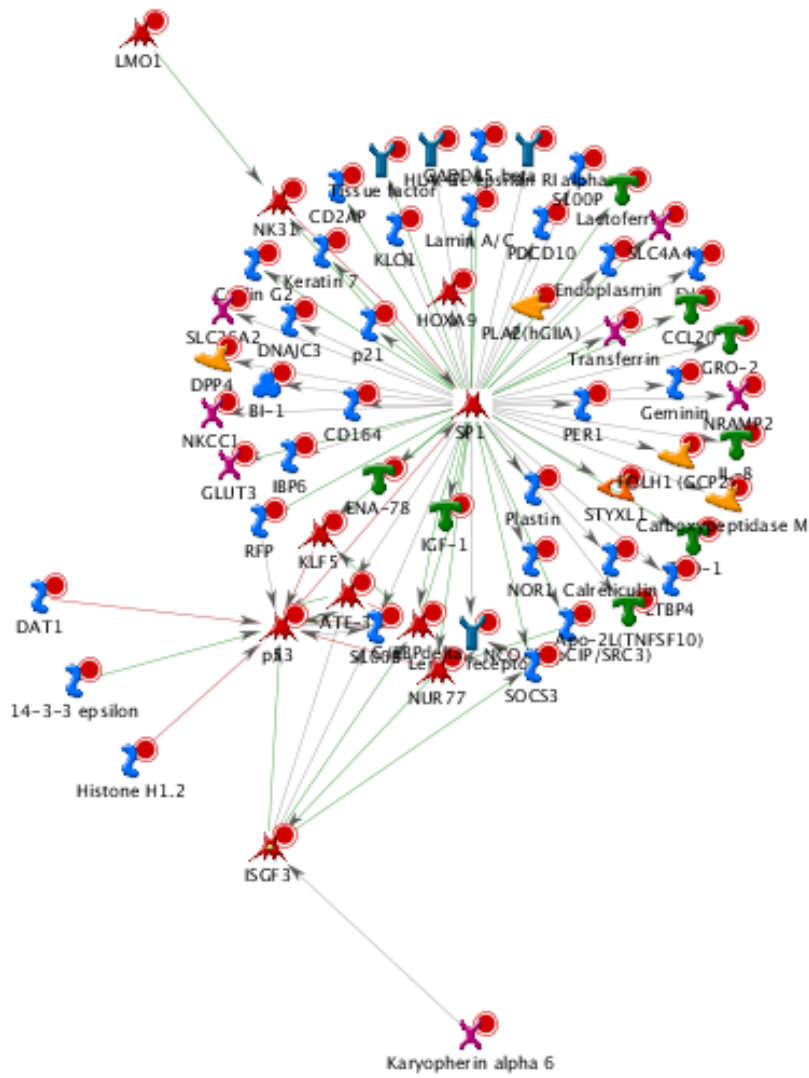

- | Enzymes                      |                                | Generic classes                     |                                          |
|------------------------------|--------------------------------|-------------------------------------|------------------------------------------|
| Generic enzyme               | <b>KINASE</b>                  | Receptor ligand                     | Transcription factor                     |
| Generic kinase               | <b>PHOSPHATASE</b>             | Protein                             | Cell membrane glycoprotein               |
| Protein kinase               | Generic phosphatase            | Compound                            | Predicted metabolite or user's structure |
| Lipid kinase                 | Protein phosphatase            | Inorganic ion                       | Reaction                                 |
| <b>PHOSPHOLIPASE</b>         | Lipid phosphatase              | RNA                                 | DNA                                      |
| Generic phospholipase        | <b>PROTEASE</b>                | RNA                                 | Generic binding protein                  |
| Generic protease             | GTPase                         | <b>G protein adaptor/regulators</b> | G beta/gamma                             |
| Metalloprotease              | G-alpha                        | Regulators (GCL, SAR, GEF etc.)     |                                          |
| <b>Channels/Transporters</b> | RAS - superfamily              |                                     |                                          |
| Generic channel              | <b>Receptors</b>               |                                     |                                          |
| Ligand-gated ion channel     | Generic receptor               |                                     |                                          |
| Voltage-gated ion channel    | GPCR                           |                                     |                                          |
| Transporter                  | Receptors with enzyme activity |                                     |                                          |
