# Supplementary material for: Expression Changes in the Stroma of Prostate Cancer Predict Subsequent Relapse
Source: PLoS One. 2012 Aug 1;7(8):e41371. doi: 10.1371/journal.pone.0041371 (PMC3411675; doi:10.1371/journal.pone.0041371)
Supplement: Table S1 — MetaCore pathway analysis of the 194 genes (the combination of the 131 probe sets identified by PAM analysis and the 115 probe sets identified from correlation analysis) using ‘smooth muscle + disease biomarker’ and ‘prostatic neoplasms transcription’ as filtering parameters. (XLS) [file pone.0041371.s005.xls]

## Sheet: Annotation
Networks or Diseases	The signficantly enriched networks or diseases
pValue	p values of the enrichment test
Ratio	The numbers in green are the numbers of genes in the input list; the numbers in red are the total numbers of genes in the entire genome that are involved in the newworks or diseases.

## Sheet: Smooth muscle_Disease biomarker
#	Networks	pValue	Ratio
1	Breast neoplasm_Cell cycle regulation	0.0005215	7	52
2	Colonic Neoplasms_Regulation of cell proliferation	0.005969	5	42
3	Breast neoplasm_Coagulation	0.006608	5	43
4	Prostatic Neoplasms_Transcription	0.009558	8	107
5	Breast neoplasm_NO metabolism	0.01149	5	49
6	Hepatitis (core network)	0.01201	10	158
7	Cystic Fibrosis (core network)	0.01306	4	33
8	Breast neoplasm_Anti-apoptosis	0.01399	6	71
9	Breast neoplasm_Transcription regulation	0.02359	9	150
10	Multiple Sclerosis (core network)	0.02407	6	80
11	Breast neoplasm_NGFR signaling through Erk	0.0319	4	43
12	Colorectal neoplasms_Response to DNA damage stimulus	0.03937	3	27
13	Amyotrophic Lateral Sclerosis (core network)	0.04829	4	49
14	Breast neoplasm_p300	0.0514	4	50
15	Colorectal neoplasms_Induction of apoptosis	0.06043	3	32
16	Lung Neoplasms_Signal transduction	0.08742	5	84
17	Ovarian Neoplasms (core network 1)	0.1115	6	117
18	Breast neoplasm_BrcA1	0.1274	3	44
19	Breast neoplasm_Cell-cell signaling	0.1518	5	100
20	Breast neoplasm_androgen receptor	0.1678	3	50
21	Breast neoplasm_p53	0.1892	3	53
22	Breast neoplasm_TGF signaling_cell cycle	0.2089	2	30
23	Obesity (core network)	0.2102	5	112
24	Pulmonary Disease, Chronic Obstructive (core network)	0.2114	3	56
25	Colonic Neoplasms_Cell cycle	0.2494	3	61
26	Lung Neoplasms_Regulation of progression through cell cycle	0.2514	2	34
27	Prostatic Neoplasms_Regulation of progression through cell cycle	0.3201	3	70
28	Glaucoma (core network)	0.3281	3	71
29	Bladder Neoplasms (core network)	0.3317	5	134
30	Breast neoplasm_ADAM17	0.336	3	72
31	Lung Neoplasms_Cell cycle	0.3471	2	43
32	Breast neoplasm_Calcium signaling	0.368	2	45
33	Breast neoplasm_IL6 and SP1	0.3783	2	46
34	Breast neoplasm_Regulation of progression through cell cycle	0.3886	2	47
35	Alzheimer disease (core network)	0.4082	4	114
36	Thyroid Neoplasms (core network)	0.4082	4	114
37	Breast neoplasm_AP-1	0.4089	2	49
38	Breast neoplasm_CREB1	0.4089	2	49
39	Breast neoplasm_Inflammation	0.419	2	50
40	Breast neoplasm_Gene transcription	0.419	2	50
41	Breast neoplasm_ATF-2	0.419	2	50
42	Breast neoplasm_Metabolism regulation	0.4289	2	51
43	Breast neoplasm_Apoptosis through caspases	0.4388	2	52
44	Breast neoplasm_PPAR regulation by TGF-beta	0.4583	2	54
45	Breast neoplasm_PI3K reg	0.4679	2	55
46	Tuberculosis (core network)	0.4679	2	55
47	Schizophrenia	0.4732	6	193
48	Breast neoplasm_Endothelins	0.4961	2	58
49	Asthma (core network)	0.5052	3	94
50	Prostatic Neoplasms_Inflammatory response	0.5155	1	25

## Sheet: Smooth muscle_Disease
#	Diseases	pValue	Ratio
1	Colorectal Neoplasms	3.271e-14	99	3870
2	Intestinal Neoplasms	3.579e-14	99	3875
3	Intestinal Diseases	6.647e-14	102	4110
4	Neoplasms, Ductal, Lobular, and Medullary	3.238e-13	46	1064
5	Breast Neoplasms	3.388e-13	85	3110
6	Breast Diseases	3.453e-13	85	3111
7	Carcinoma, Ductal	3.708e-13	44	983
8	Urogenital Neoplasms	4.255e-13	85	3122
9	Colonic Diseases	6.817e-13	98	3978
10	Gastrointestinal Neoplasms	2.317e-12	116	5330
11	Digestive System Neoplasms	4.788e-12	123	5919
12	Gastrointestinal Diseases	9.551e-12	117	5503
13	Skin Diseases	8.767e-11	91	3815
14	Digestive System Diseases	1.079e-10	128	6551
15	Carcinoma	1.087e-10	87	3568
16	Respiratory Tract Diseases	2.625e-10	100	4500
17	Adenocarcinoma	2.802e-10	74	2816
18	Neoplastic Processes	3.078e-10	37	886
19	Carcinoma, Ductal, Breast	3.101e-10	34	760
20	Lung Neoplasms	3.191e-10	84	3444
21	Lung Diseases	3.53e-10	98	4382
22	Respiratory Tract Neoplasms	3.559e-10	84	3451
23	Prostatic Diseases	3.846e-10	67	2422
24	Thoracic Neoplasms	4.632e-10	84	3468
25	Rectal Diseases	5.437e-10	90	3870
26	Pathologic Processes	7.65e-10	72	2755
27	Prostatic Neoplasms	8.793e-10	66	2410
28	Genital Neoplasms, Male	1.233e-09	66	2429
29	Neoplasms, Glandular and Epithelial	1.301e-09	98	4476
30	Neoplasms by Site	1.575e-09	145	8258
31	Skin and Connective Tissue Diseases	3.255e-09	95	4336
32	Myeloproliferative Disorders	4.31e-09	19	275
33	Pancreatic Diseases	5.281e-09	57	1999
34	Neoplasms	7.722e-09	158	9707
35	Leukemia, Myeloid	8.189e-09	29	650
36	Leukemia, Myelogenous, Chronic, BCR-ABL Positive	2.152e-08	14	157
37	Stomach Neoplasms	3.05e-08	75	3178
38	Neoplasms by Histologic Type	4.097e-08	110	5623
39	Stomach Diseases	4.585e-08	75	3207
40	Nevi and Melanomas	4.843e-08	34	927
41	Flaviviridae Infections	7.857e-08	20	364
42	Colonic Neoplasms	1.028e-07	48	1666
43	Carcinoma, Non-Small-Cell Lung	1.533e-07	63	2549
44	Inflammation	1.638e-07	33	928
45	Neoplasm Metastasis	1.656e-07	31	836
46	Leukemia, Myeloid, Acute	2.065e-07	23	501
47	Cystic Fibrosis	2.073e-07	30	799
48	Infant, Newborn, Diseases	2.261e-07	33	941
49	Hyperinsulinism	2.504e-07	27	673
50	Carcinoma, Bronchogenic	2.91e-07	65	2715
